# Supplementary material for: Timing and Patterns in the Taxonomic Diversification of Lepidoptera (Butterflies and Moths)
Source: PubMed Central journal article supplement (PMC3839996; doi:10.1371/journal.pone.0080875), 2013-11-25

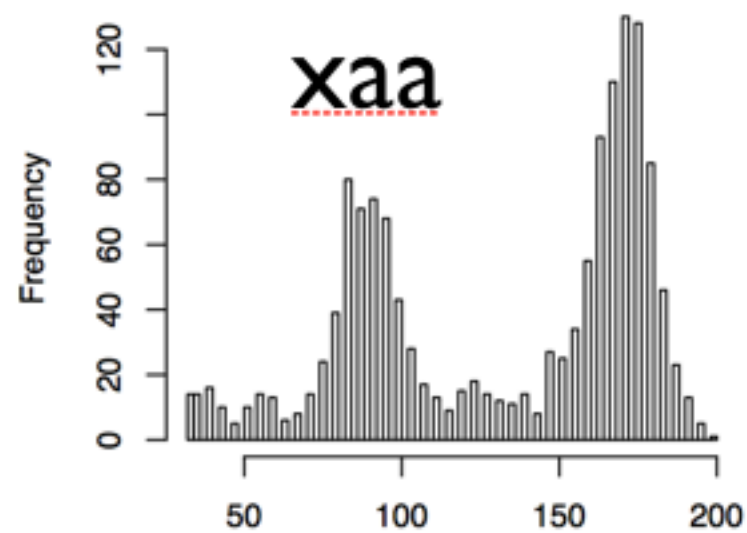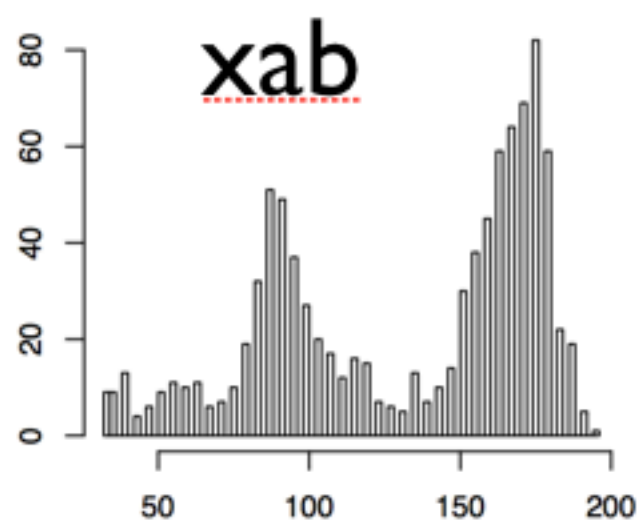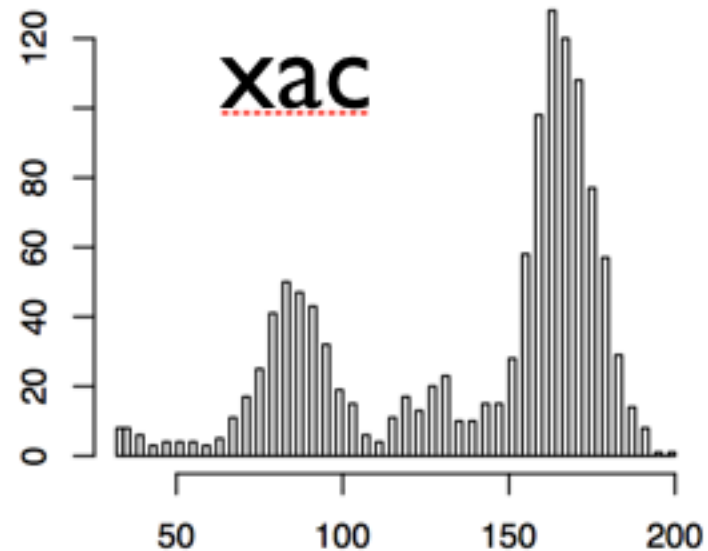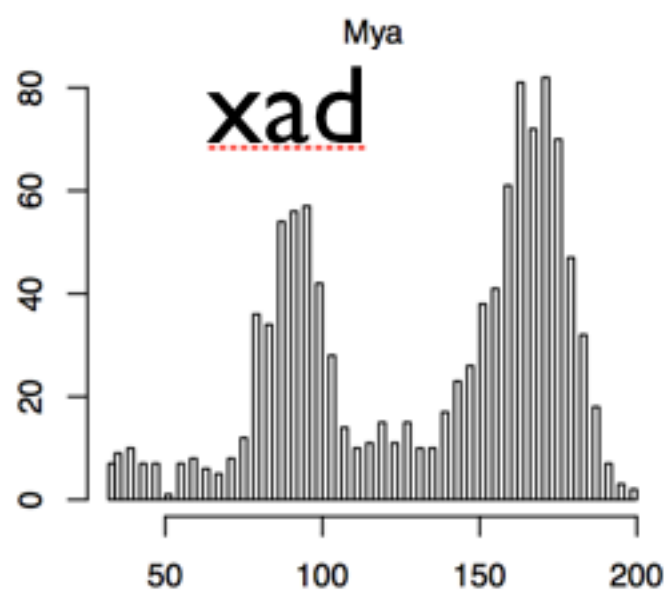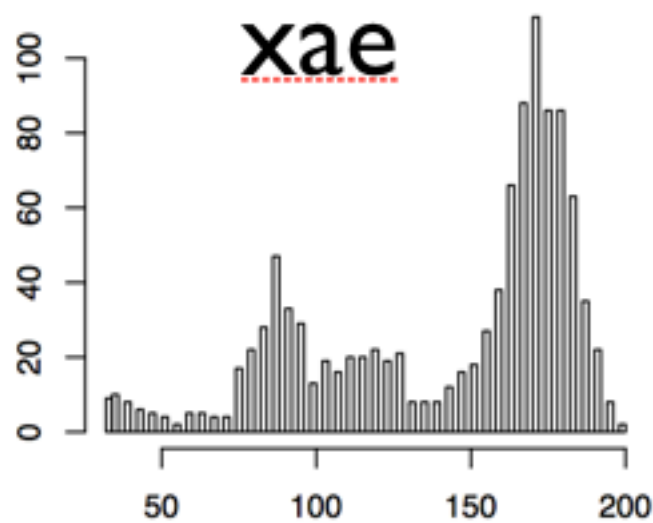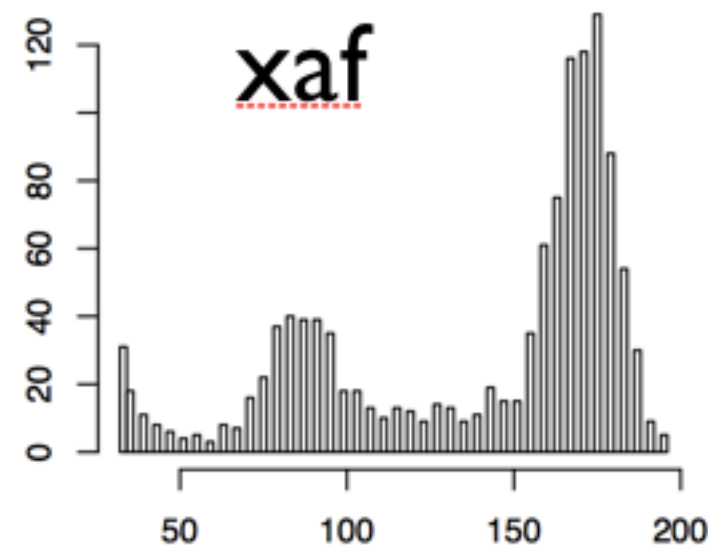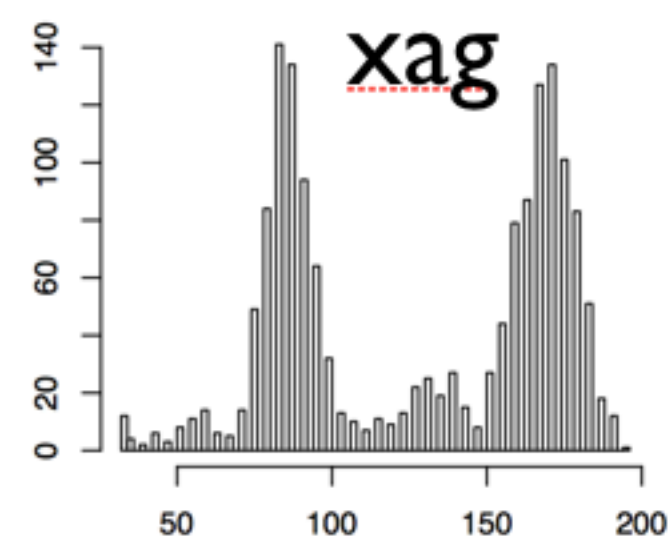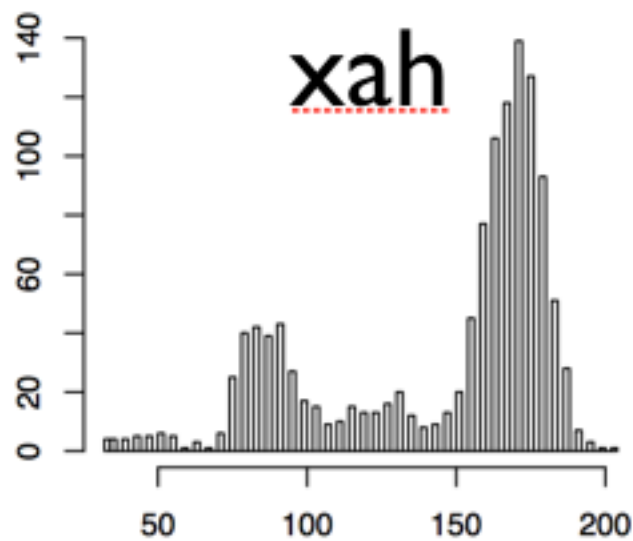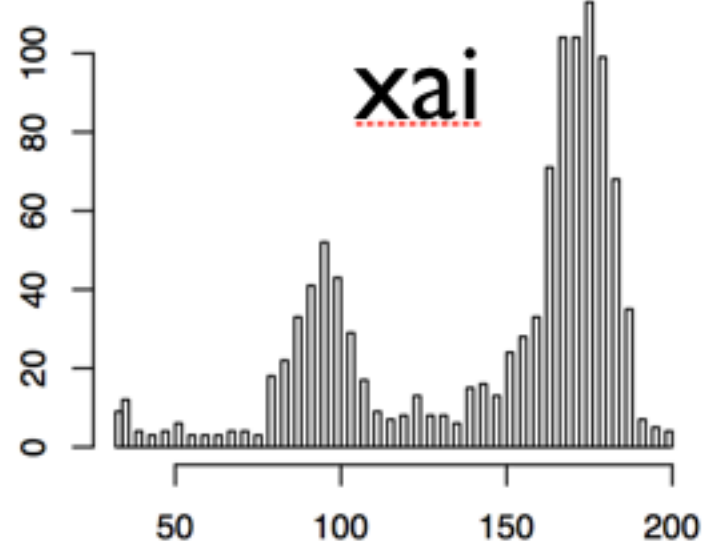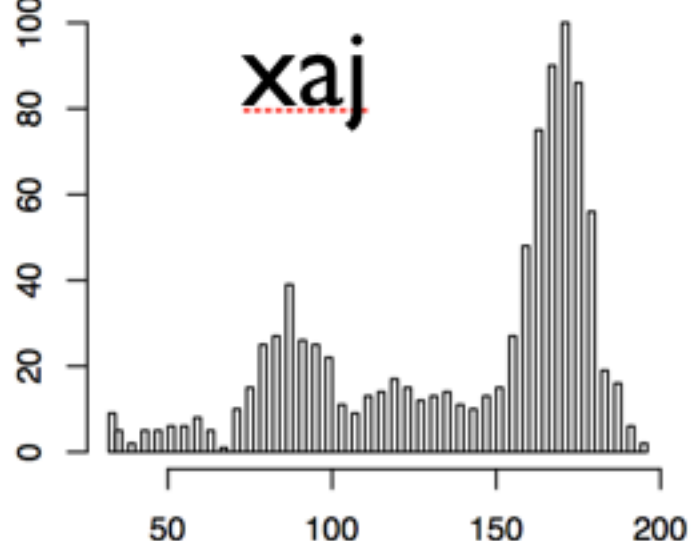

Supplement: pone.0080875.s002.pdf [file pone.0080875.s002.pdf]
